# Supplementary material for: Synthesis of MAPA Reagents and 2-Alkyl(aryl)aminopyridines from 2-Bromopyridine Using the Goldberg Reaction
Source: MDPI journal article supplement (doi:10.3390/molecules27061833), 2022-03-11
Supplement: s1 [file s1]

## Supplementary Materials

### Synthesis of MAPA Reagents and 2-Alkyl(aryl)aminopyridines from 2-Bromopyridine using the Goldberg Reaction

Daniel L. Comins <sup>1,\*</sup>

<sup>1</sup>Department of Chemistry, North Carolina State University, Raleigh, North Carolina 27695-8204;  
dlcomins@ncsu.edu

#### Table of Contents

<sup>1</sup>H NMR spectra of all purified products (**1**, **2a-b**, **3a-e**). S2-S9

All products are known compounds previously published in the literature. Spectral data and properties of the products are in agreement with literature values. The <sup>1</sup>H NMR spectra of the purified products are found below.

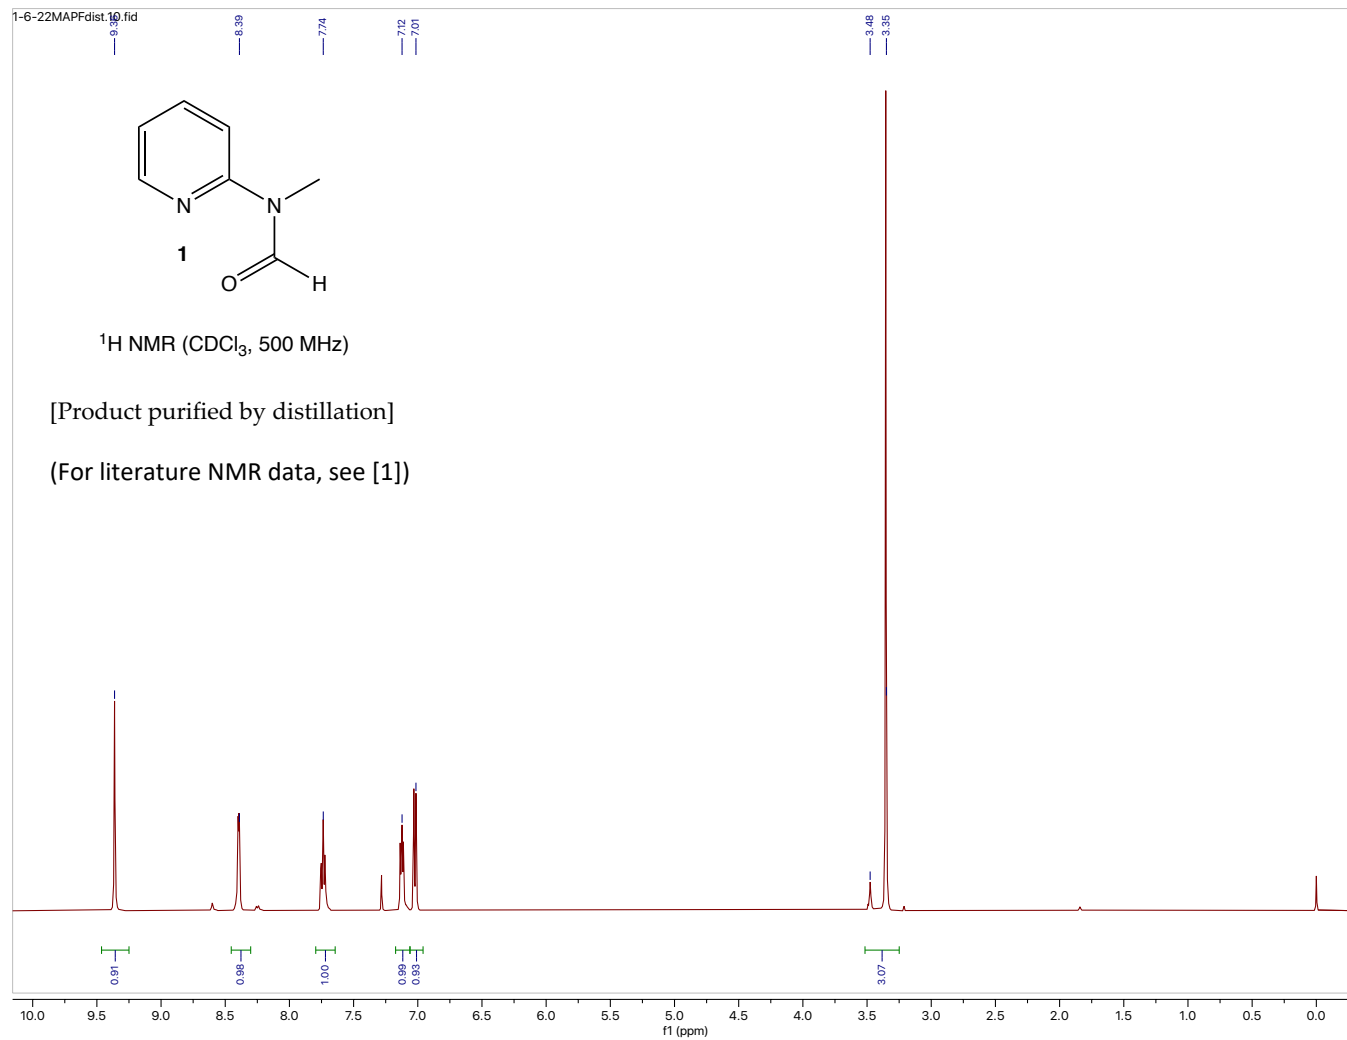

**Figure S1.**  $^1\text{H}$  NMR spectrum of **1**.

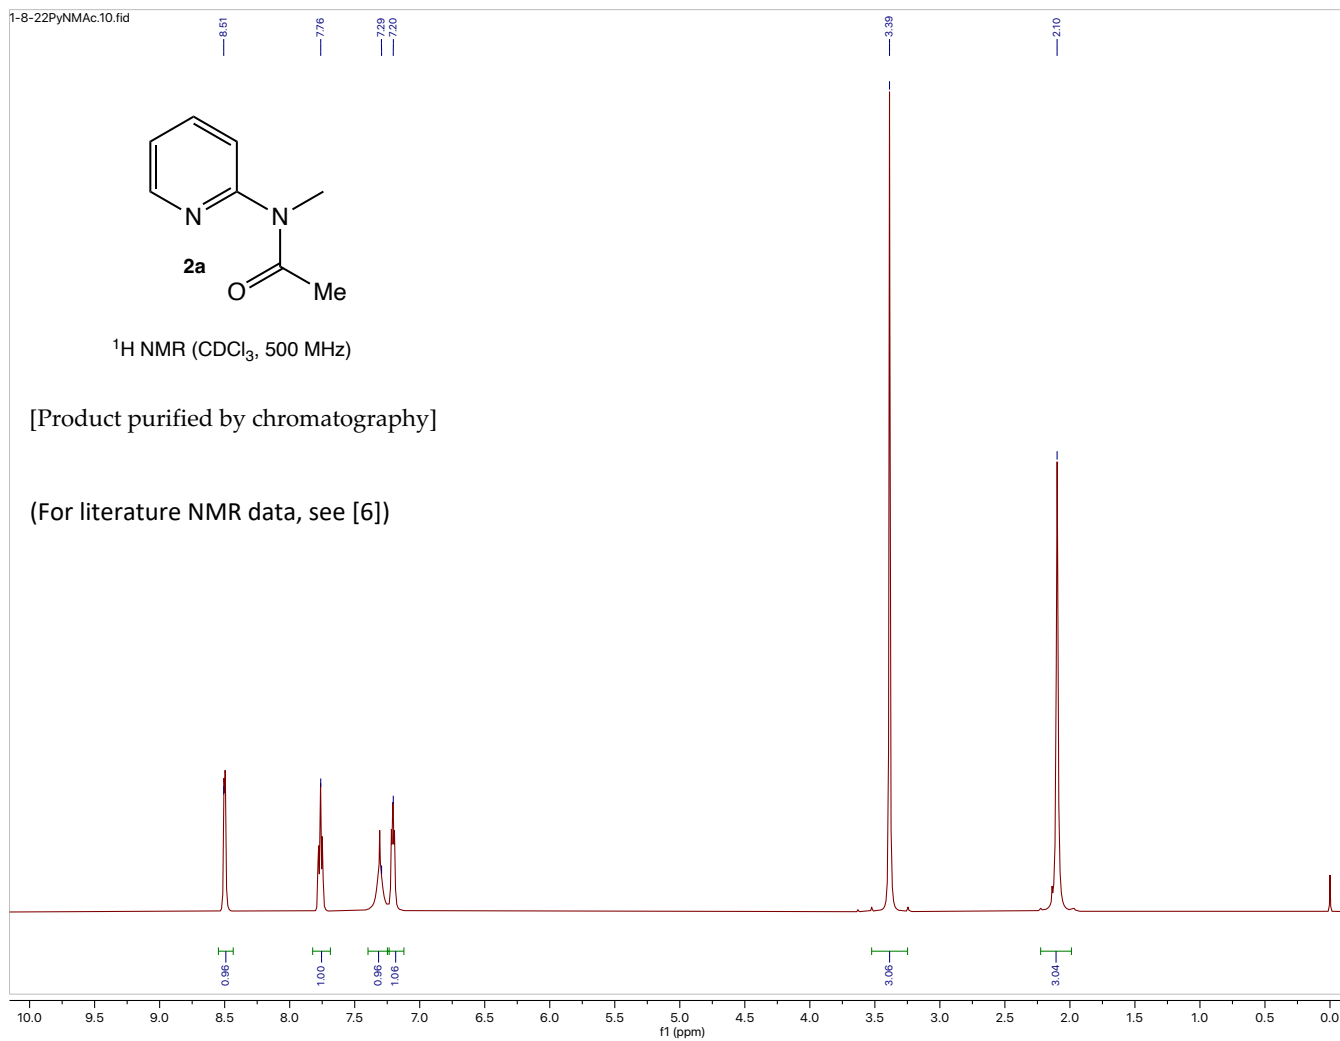

**Figure S2.**  $^1\text{H}$  NMR spectrum of **2a**.

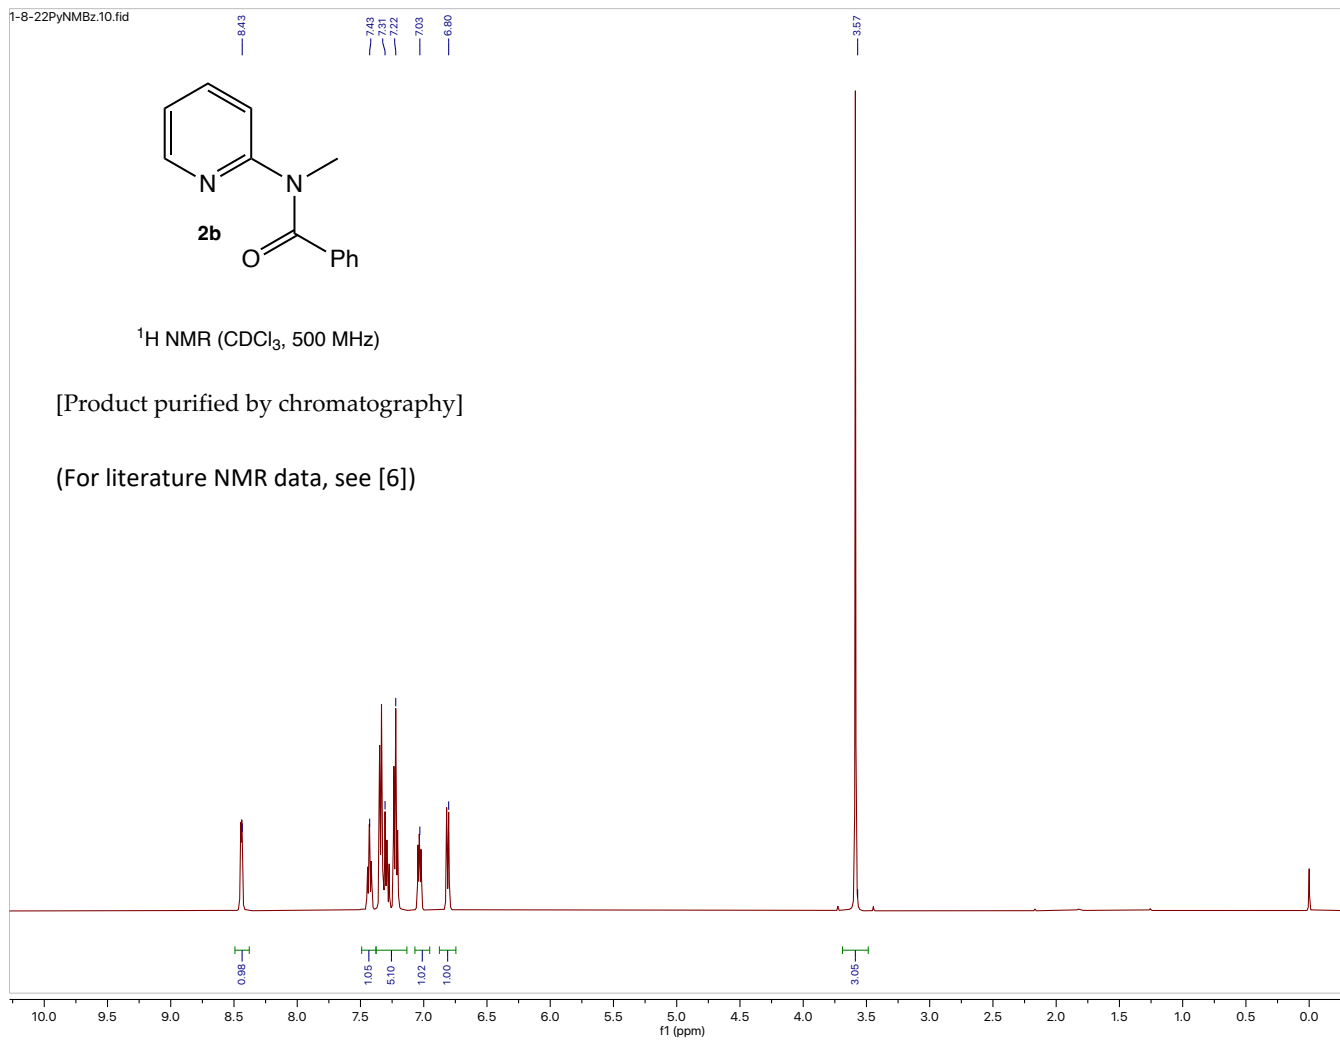

**Figure S3.**  $^1\text{H}$  NMR spectrum of **2b**.

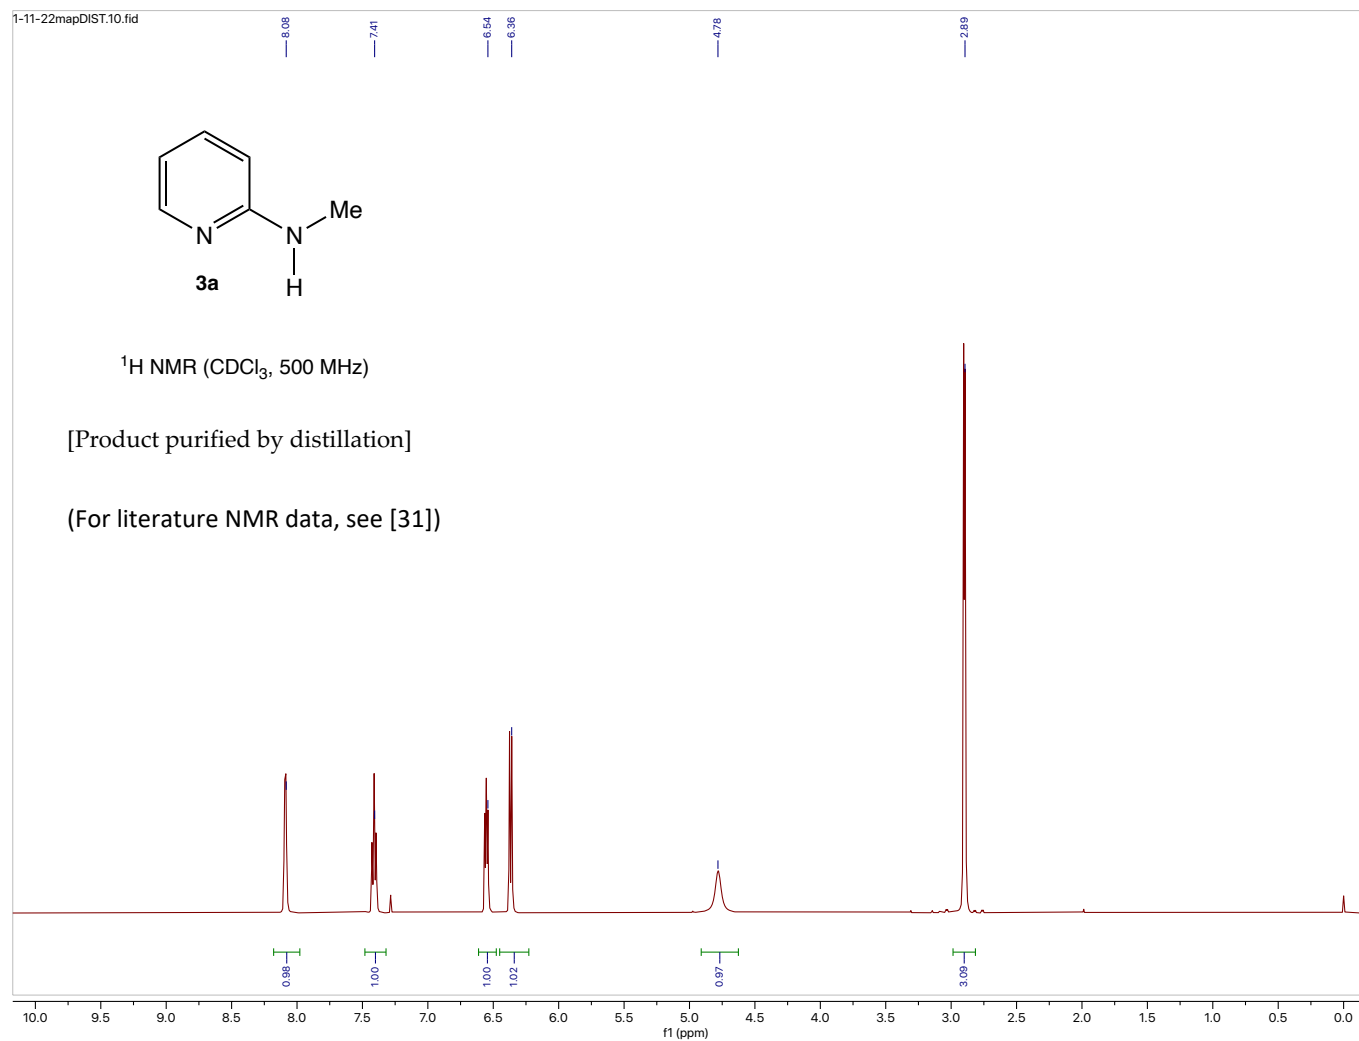

**Figure S4.**  $^1\text{H}$  NMR spectrum of **3a**.

12-15-21pYnbUhrPLC.10.fid

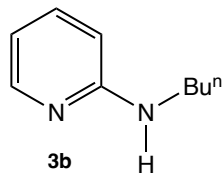

$^1\text{H}$  NMR ( $\text{CDCl}_3$ , 500 MHz)

[Product purified by chromatography]

(For literature NMR data, see [32])

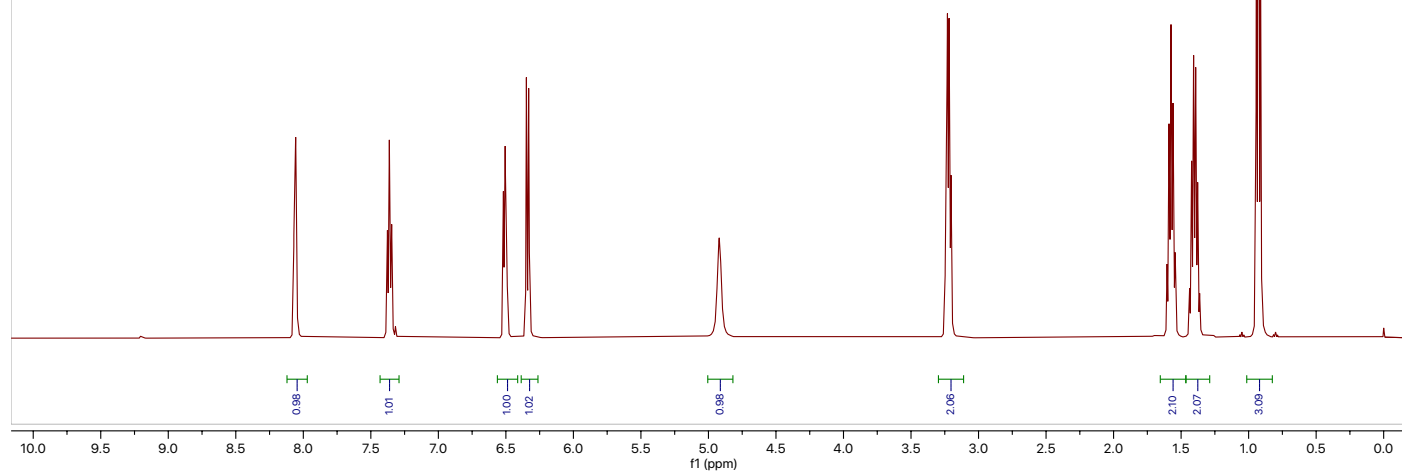

**Figure S5.**  $^1\text{H}$  NMR spectrum of **3b**.

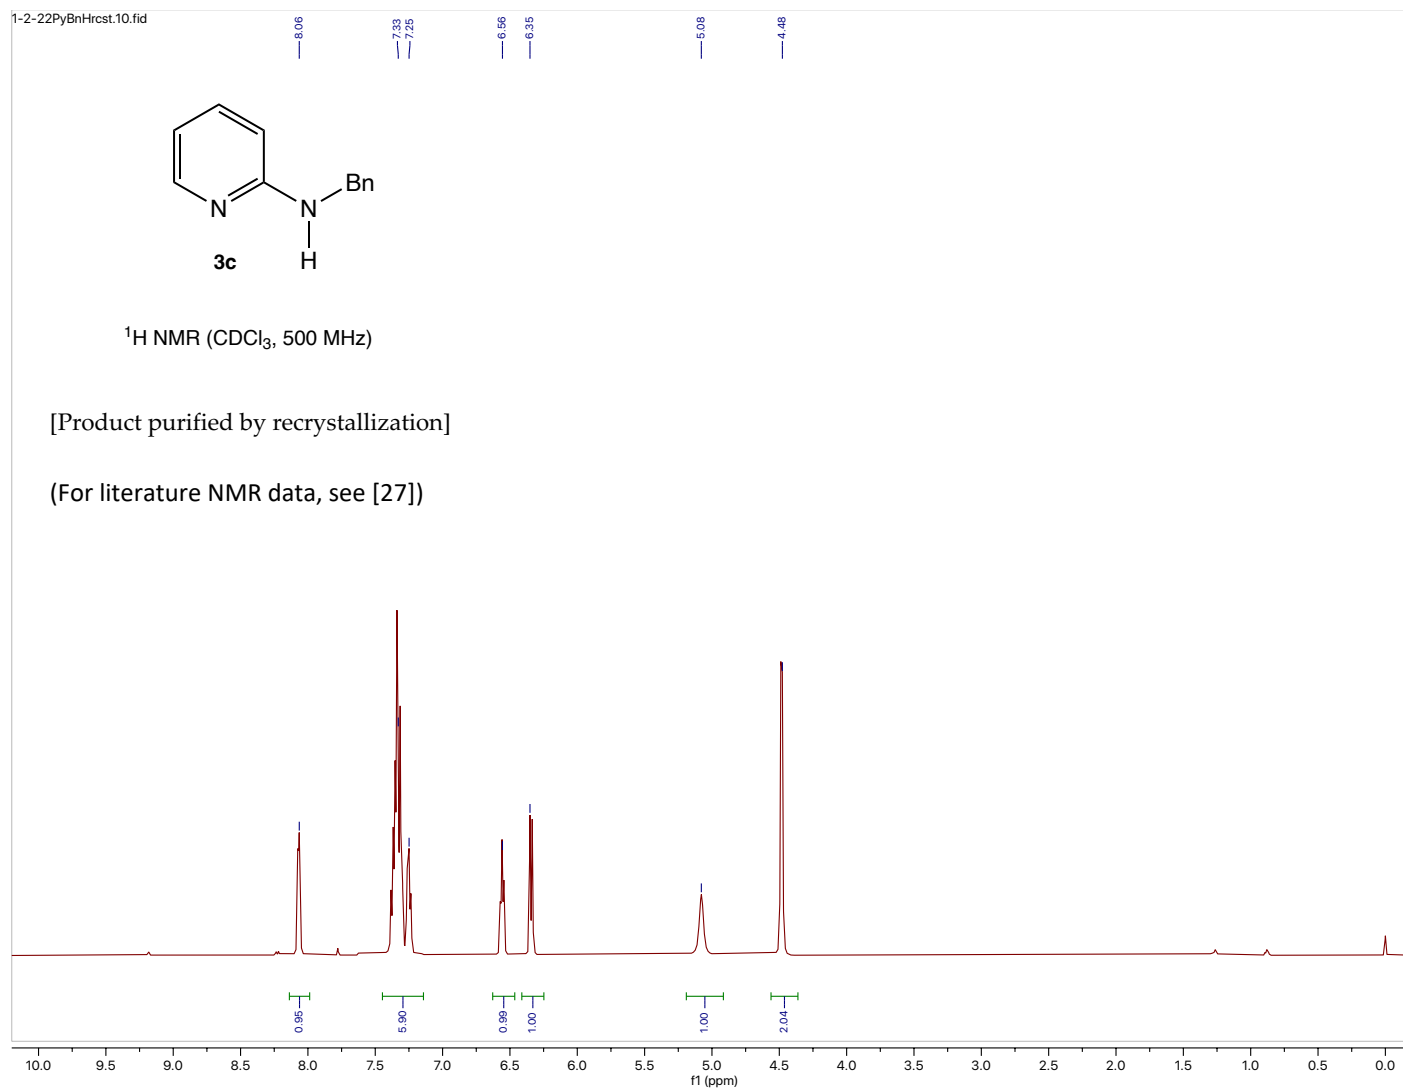

**Figure S6.**  $^1\text{H}$  NMR spectrum of **3c**.

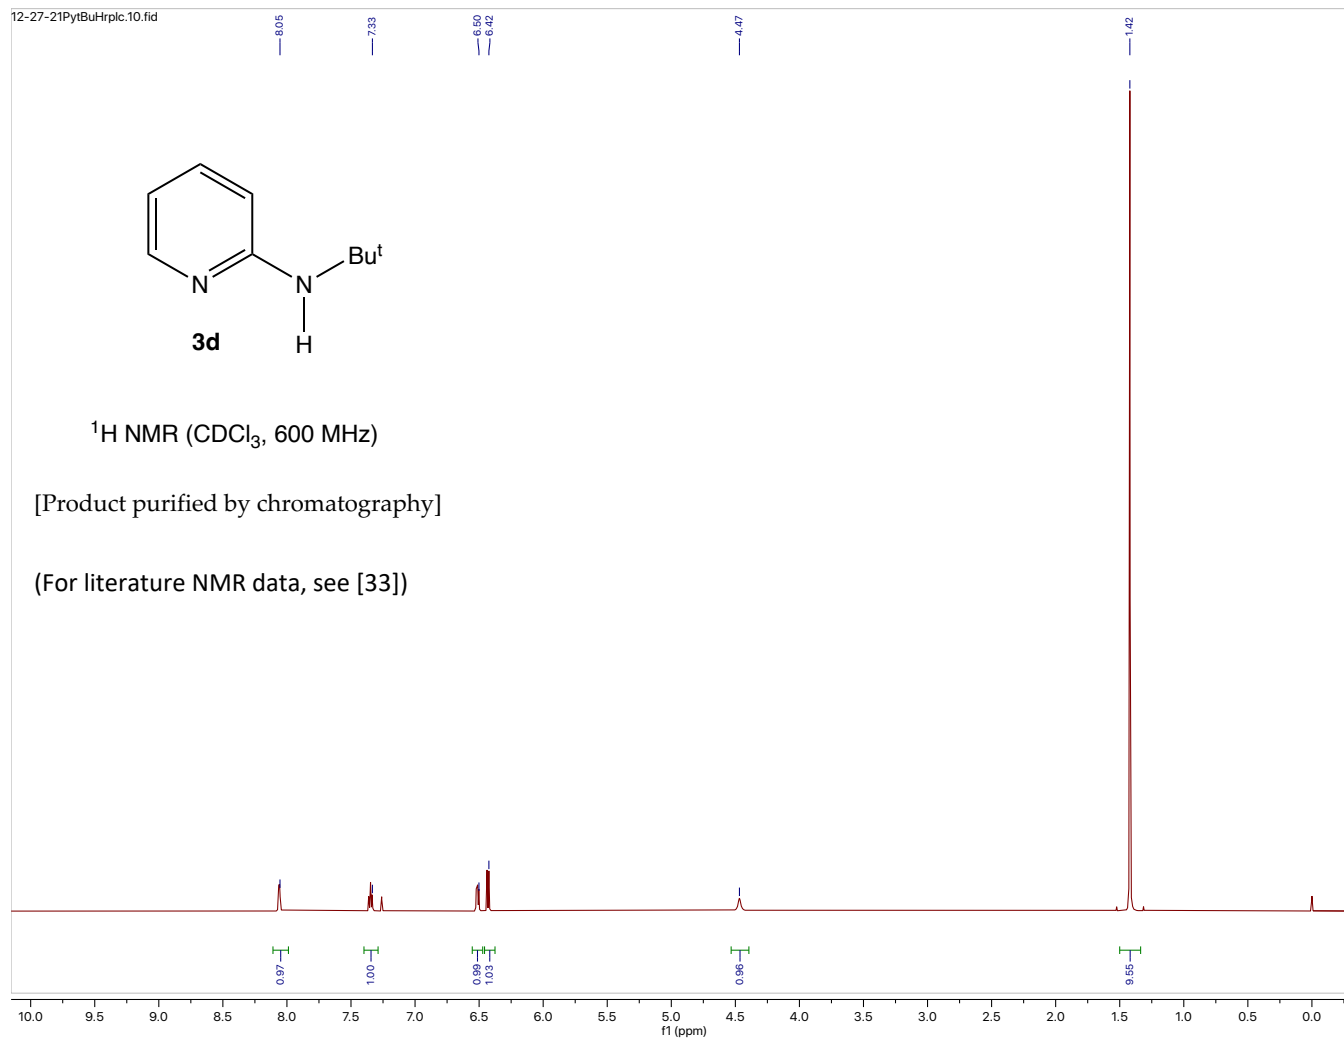

**Figure S7.**  $^1\text{H}$  NMR spectrum of **3d**.



DLC10-15-21.10.fid

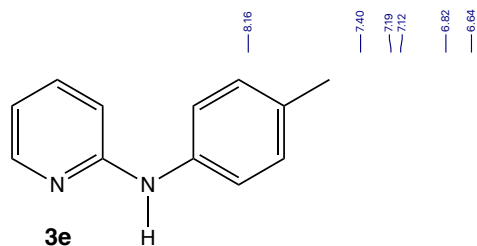

$^1\text{H}$  NMR ( $\text{CDCl}_3$ , 500 MHz)

[Product purified by chromatography]

(For literature NMR data, see [28])

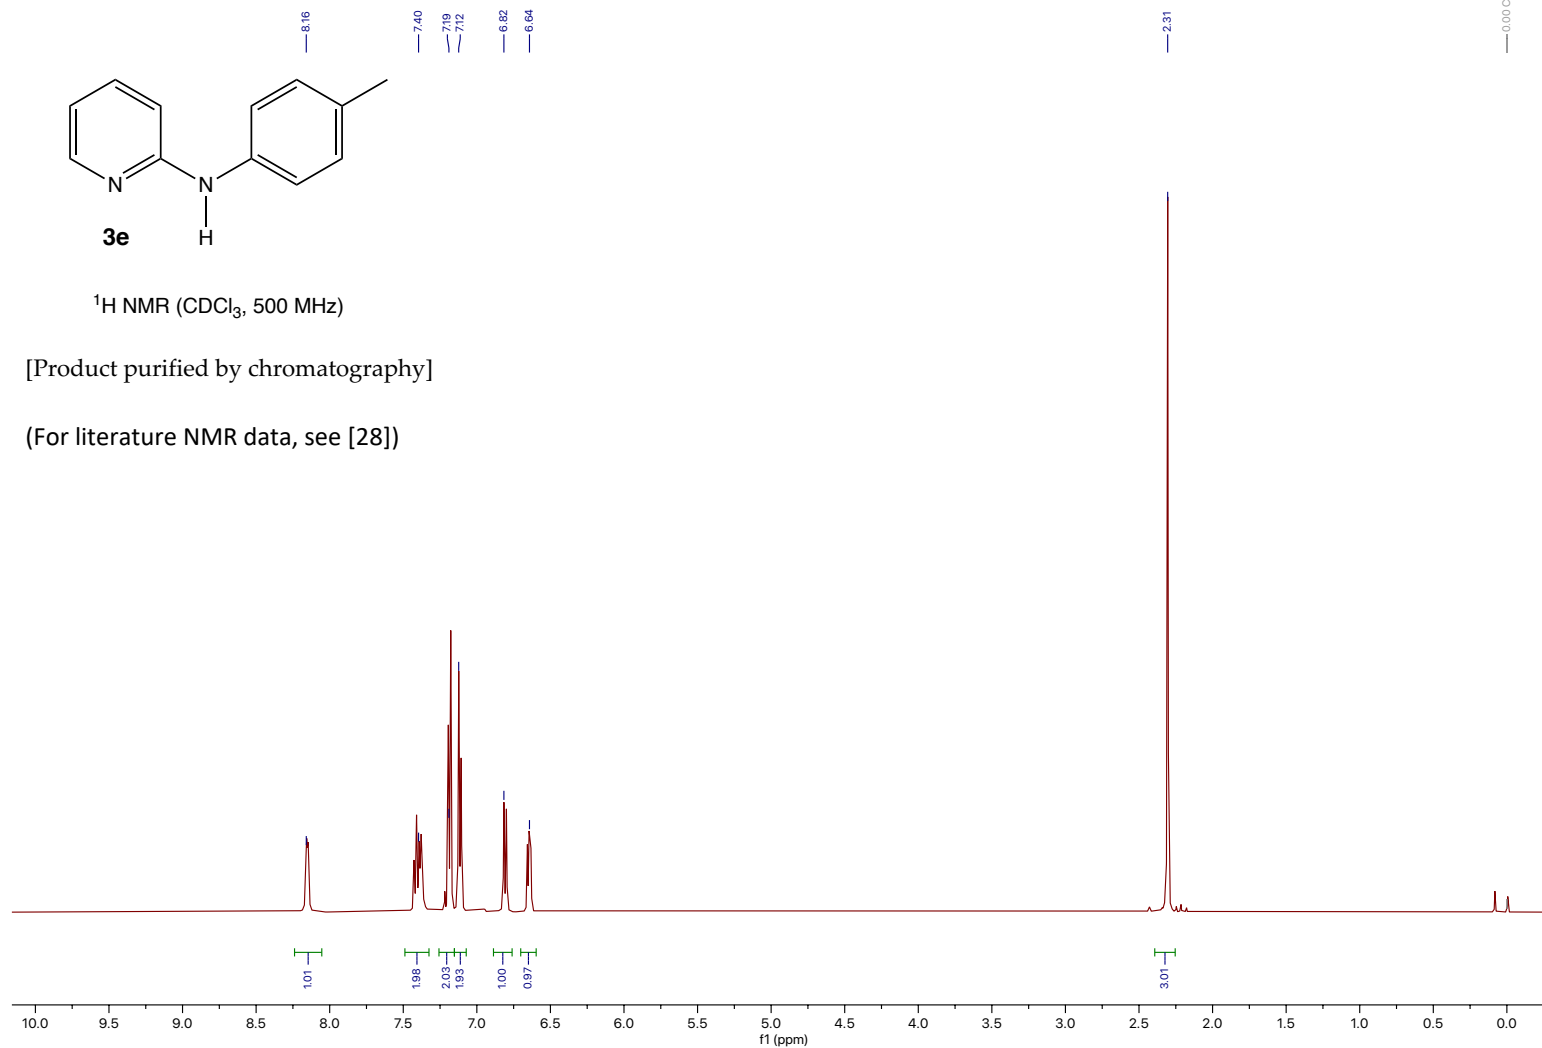

**Figure S8.**  $^1\text{H}$  NMR spectrum of **3e**.
